# Supplementary material for: In situ immunization of a TLR9 agonist virus-like particle enhances anti-PD1 therapy
Source: PubMed Central journal article supplement — J Immunother Cancer. 2020 Oct 15;8(2):e000940. doi: 10.1136/jitc-2020-000940 (PMC7566437; doi:10.1136/jitc-2020-000940), 2020-10-15
Supplement: jitc-2020-000940supp002.pdf [file jitc-2020-000940supp002.pdf]

**Supplementary Table 1. Correlation between TLR9 expression and clinical outcomes in HNSCC patients**

| Patient characteristics                | Total<br>(n=520) | TLR9 expression     |                      | P-value  |
|----------------------------------------|------------------|---------------------|----------------------|----------|
|                                        |                  | Low TLR9<br>(n=236) | High TLR9<br>(n=284) |          |
| <b>Gender</b>                          |                  |                     |                      |          |
| Female                                 | 26.2% (136)      | 24.6% (58)          | 27.5% (78)           | P>0.9999 |
| Male                                   | 73.8% (384)      | 75.4% (178)         | 72.5% (206)          |          |
| Median age at diagnosis (Range)        | 61 (19-90)       | 61 (24-88)          | 60 (19-90)           | -        |
| <b>Clinical stage</b>                  |                  |                     |                      |          |
| I                                      | 3.8% (20)        | 1.7% (4)            | 5.6% (16)            | P=0.99   |
| II                                     | 18.8% (98)       | 20.3% (48)          | 17.6% (50)           |          |
| III                                    | 20.2% (105)      | 22.0% (52)          | 18.7% (53)           |          |
| IV                                     | 54.4% (283)      | 52.5 (124)          | 56% (159)            |          |
| Unknown                                | 2.7% (14)        | 3.4% (8)            | 2.1% (6)             |          |
| <b>Primary therapy outcome success</b> |                  |                     |                      |          |
| Complete remission/response            | 71.5% (372)      | 69.9% (165)         | 72.9% (207)          | P=0.97   |
| Partial remission/response             | 1.2% (6)         | 0.8% (2)            | 1.4% (4)             |          |
| Persistent disease                     | 0.8% (4)         | 1.3% (3)            | 0.4% (1)             |          |
| Progressive disease                    | 7.5% (39)        | 9.3% (22)           | 6.0% (17)            |          |
| Stable disease                         | 1.2% (6)         | 0.4% (1)            | 1.8% (5)             |          |
| Unknown                                | 17.9% (93)       | 18.2% (43)          | 17.6% (50)           |          |
| <b>Follow up treatment success</b>     |                  |                     |                      |          |
| Complete remission/response            | 43.6% (227)      | 41.1% (97)          | 45.8% (130)          | P=0.98   |
| Partial remission/response             | 1.0% (5)         | 1.3% (3)            | 0.7% (2)             |          |
| Persistent disease                     | 2.3% (12)        | 2.1% (5)            | 2.5% (7)             |          |
| Progressive disease                    | 14.4% (75)       | 14.8% (35)          | 14.1% (40)           |          |
| Stable disease                         | 1.3% (7)         | 0.8% (2)            | 1.8% (5)             |          |
| Unknown                                | 37.3% (194)      | 39.8% (94)          | 35.2% (100)          |          |
| <b>HPV status</b>                      |                  |                     |                      |          |
| Negative                               | 14.0% (73)       | 11.9% (28)          | 15.8% (45)           | P>0.99   |
| Positive                               | 7.3% (38)        | 3.4% (8)            | 10.6% (30)           |          |
| Unknown                                | 78.6% (409)      | 84.7% (200)         | 73.6% (209)          |          |
| <b>Radiation therapy</b>               |                  |                     |                      |          |
| Yes                                    | 56% (291)        | 57.2% (135)         | 54.9% (156)          | P=0.98   |
| No                                     | 30.6% (159)      | 28.8% (68)          | 32% (91)             |          |
| Unknown                                | 13.5% (70)       | 14% (33)            | 13% (37)             |          |
| <b>Targeted molecular therapy</b>      |                  |                     |                      |          |
| Yes                                    | 28.5% (148)      | 24.2% (57)          | 32% (91)             | P=0.99   |
| No                                     | 50% (260)        | 52.1% (123)         | 48.2% (137)          |          |
| Unknown                                | 21.5% (112)      | 23.7% (56)          | 19.7% (56)           |          |
