# Supplementary figures and images for: In situ immunization of a TLR9 agonist virus-like particle enhances anti-PD1 therapy
Source: PubMed Central journal article supplement — J Immunother Cancer. 2020 Oct 15;8(2):e000940. doi: 10.1136/jitc-2020-000940 (PMC7566437; doi:10.1136/jitc-2020-000940), 2020-10-15

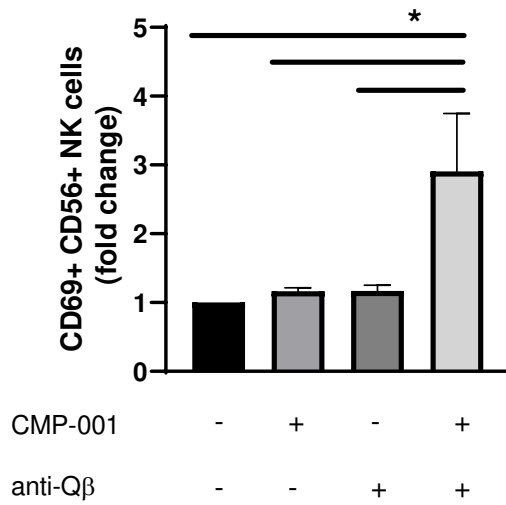

Supplement: jitc-2020-000940supp001.pdf [file jitc-2020-000940supp001.pdf]
